# Supplementary figures and images for: Antimicrobial Susceptibility of Lactobacillus delbrueckii subsp. lactis from Milk Products and Other Habitats
Source: MDPI journal article supplement (doi:10.3390/foods10123145), 2021-12-18

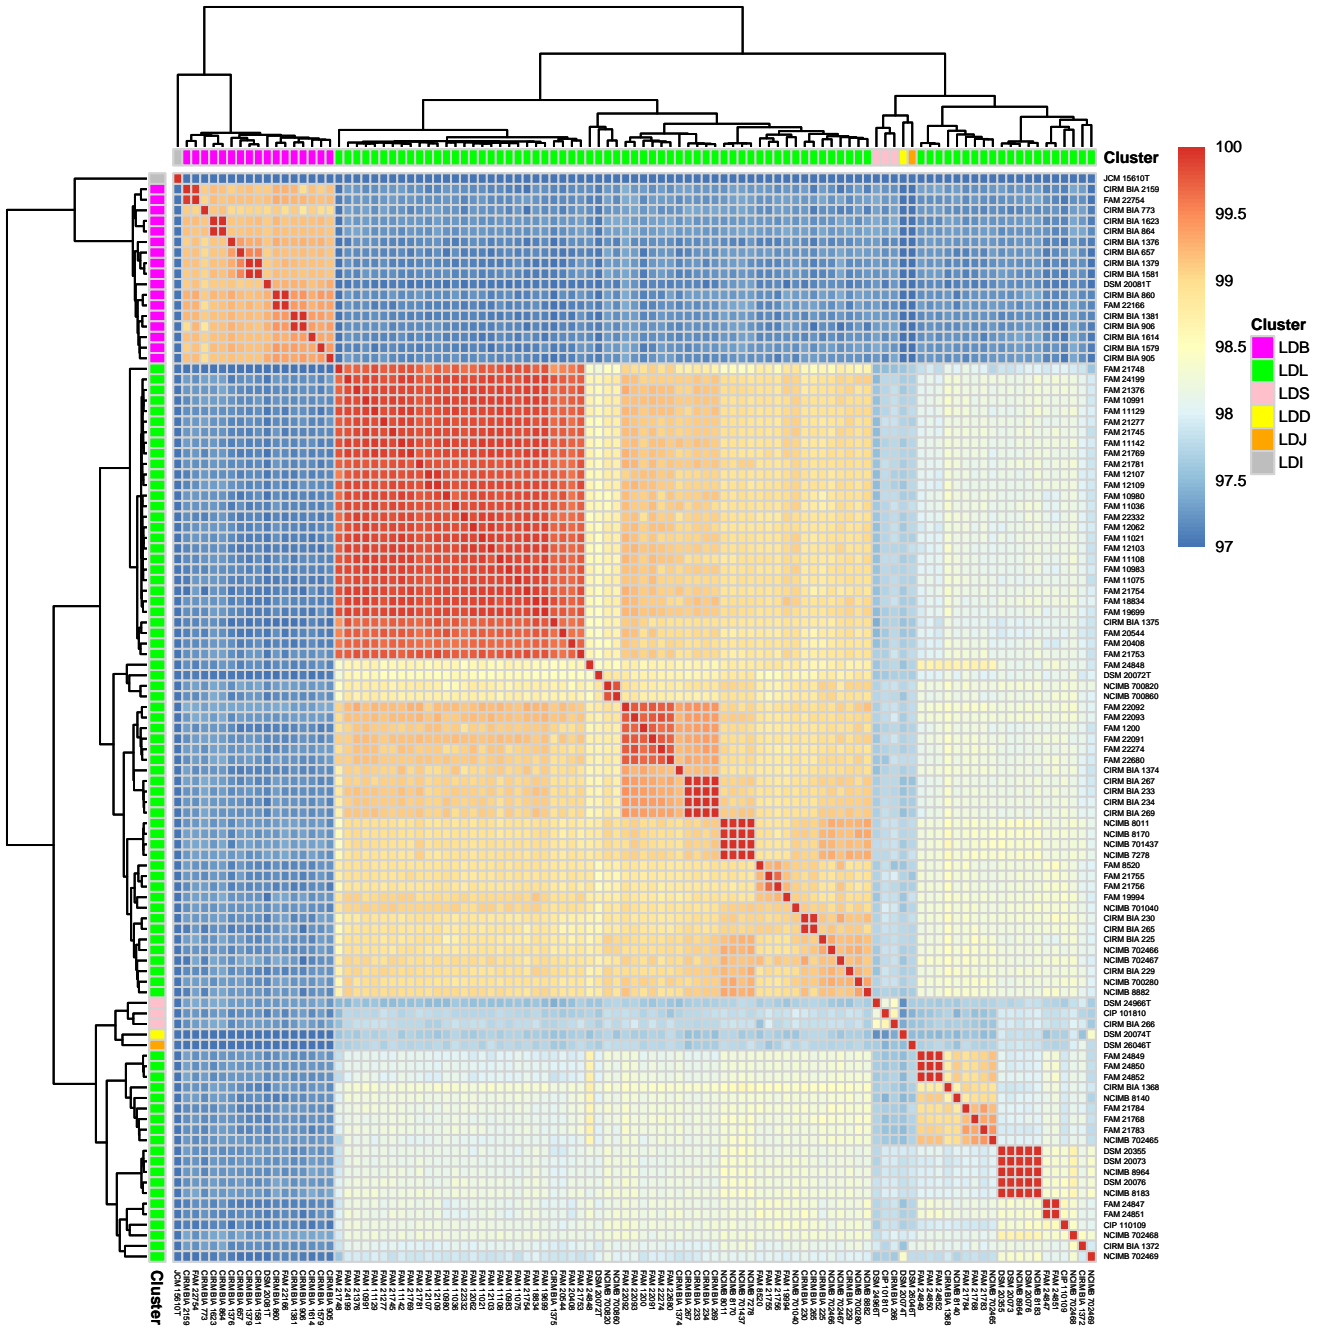

Supplement: s1 [file s1]
